1 **Effectiveness of training general practitioners in two methods (ABC versus 5A) of providing**  
2 **brief stop-smoking advice: a pragmatic, 2-arm cluster randomised controlled trial**  
3 **v1-5 (26.03.2020)**

4  
5 **Authors**

6 Sabrina Kastaun<sup>1\*</sup>, Verena Leve<sup>1</sup>, Jaqueline Hildebrandt<sup>1</sup>, Christian Funke<sup>1</sup>, Stephanie Klosterhalfen<sup>1</sup>,  
7 Diana Lubisch<sup>1</sup>, Olaf Reddemann<sup>1</sup>, Hayden McRobbie<sup>2,3</sup>, Tobias Raupach<sup>4,5</sup>, Robert West<sup>5</sup>, Stefan  
8 Wilm<sup>1</sup>, Wolfgang Viechtbauer<sup>6</sup>, Daniel Kotz<sup>1,5,7</sup>

9  
10 **Affiliations**

11 <sup>1</sup>Institute of General Practice (ifam), Centre for Health and Society (chs), Addiction Research and  
12 Clinical Epidemiology Unit, Medical Faculty of the Heinrich-Heine-University Düsseldorf,  
13 Düsseldorf, Germany;

14 <sup>2</sup>Wolfson Institute of Preventive Medicine, Queen Mary University of London, London, UK;

15 <sup>3</sup>The Dragon Institute for Innovation, Auckland, New Zealand;

16 <sup>4</sup>Department of Cardiology and Pneumology, University Medical Centre Göttingen, Göttingen,  
17 Germany;

18 <sup>5</sup>Behavioural Science and Health, Institute of Epidemiology and Health Care, University College  
19 London, London, UK;

20 <sup>6</sup>Department of Psychiatry and Neuropsychology, Maastricht University, Maastricht, Netherlands;

21 <sup>7</sup>Department of Family Medicine, CAPHRI School for Public Health and Primary Care, Maastricht  
22 University, Maastricht, The Netherlands

23  
24 **\*Correspondence**

25 Dr. Sabrina Kastaun, Institute of General Practice, Addiction Research and Clinical Epidemiology  
26 Unit, Medical Faculty of the Heinrich-Heine-University Düsseldorf, Moorenstr. 5, 40225 Düsseldorf,  
27 Germany, Tel: 0049-211-81-19527, Mail: Sabrina.Kastaun@med.uni-duesseldorf.de, Twitter:  
28 @KastaunS, ORCID: <https://orcid.org/0000-0002-5590-1135>

29  
30 **Email co-authors**

31 Verena Leve: [Verena.Leve@med.uni-duesseldorf.de](mailto:Verena.Leve@med.uni-duesseldorf.de)

32 Jaqueline Hildebrandt: [jaq.hildebrandt@gmail.com](mailto:jaq.hildebrandt@gmail.com)

33 Christian Funke: [Christian.Funke@med.uni-duesseldorf.de](mailto:Christian.Funke@med.uni-duesseldorf.de)

34 Stephanie Becker: [StephanieKatharina.Klosterhalfen@med.uni-duesseldorf.de](mailto:StephanieKatharina.Klosterhalfen@med.uni-duesseldorf.de)

35 Diana Lubisch: [Diana.Lubisch@med.uni-duesseldorf.de](mailto:Diana.Lubisch@med.uni-duesseldorf.de)

36 Olaf Reddemann: [Olaf.Reddemann@med.uni-duesseldorf.de](mailto:Olaf.Reddemann@med.uni-duesseldorf.de)

37 Hayden McRobbie: [hayden@thedragon.institute](mailto:hayden@thedragon.institute)

38 Tobias Raupach: [raupach@med.uni-goettingen.de](mailto:raupach@med.uni-goettingen.de)  
NOTE: This preprint reports new research that has not been certified by peer review and should not be used to guide clinical practice.

- 1 Robert West: [robertwest100@gmail.com](mailto:robertwest100@gmail.com)
- 2 Stefan Wilm: [Stefan.Wilm@med.uni-duesseldorf.de](mailto:Stefan.Wilm@med.uni-duesseldorf.de)
- 3 Wolfgang Viechtbauer: [Wolfgang.Viechtbauer@maastrichtuniversity.nl](mailto:Wolfgang.Viechtbauer@maastrichtuniversity.nl)
- 4 Daniel Kotz: [Daniel.Kotz@med.uni-duesseldorf.de](mailto:Daniel.Kotz@med.uni-duesseldorf.de)

5

6 **Manuscript word count**

7 Number of words, abstract: 597

8 Number of words, main text: 6,970

9 Number of tables: 3

10 Number of figures/charts: 2

11 Supplemental tables: 2

12

13

14

1 **ABSTRACT**

2 **OBJECTIVE**

3 To assess the effectiveness of a 3.5h-training for general practitioners (GPs) in two different methods  
4 of giving brief stop-smoking advice – 5A (ask, advice, assess, assist, arrange) or ABC (ask, brief  
5 advice, cessation support) – during routine consultations with smoking patients.

6

7 **DESIGN**

8 Pragmatic 2-arm cluster randomised controlled trial with a pre-post-design for the primary outcome  
9 and cluster randomisation for secondary outcomes.

10

11 **SETTING**

12 General practices (cluster) in the Rhine-Ruhr Metropolitan Region of the German federal state of  
13 North Rhine-Westphalia. The study opened to recruitment in June 2017 and closed in July 2019, with  
14 final follow-up in February 2020.

15

16 **PARTICIPANTS**

17 General practices with their GPs were randomised (1:1) to receive training in either 5A or ABC.  
18 Tobacco smoking patients aged  $\geq 18$  years, who routinely consulted these GPs six weeks prior or six  
19 six following the training were eligible to participate. Non-smokers, those with limited literacy or  
20 incapability to provide informed consent, or who did not see their GP in person were ineligible.

21

22 **INTERVENTIONS**

23 Two different standardised 3.5h-trainings (ABC or 5A), in small groups of ~8 GPs, in delivering brief  
24 stop-smoking advice, moderated by a senior researcher and an experienced GP peer-trainer and  
25 including role-plays with professional actors.

26

27 **MAIN OUTCOME MEASURES**

28 Primary outcome: patient-reported receipt of GP advice to quit, measured during a face-to-face  
29 interview directly following the consultation in the GP practice. Secondary outcomes included  
30 patient-reported receipt of GP delivered recommendation/prescription of evidence-based behavioural  
31 counselling; nicotine replacement therapy (NRT); varenicline or bupropion; any pharmacotherapy  
32 (NRT, varenicline or bupropion); or a combination of behavioural support and pharmacotherapy. A  
33 further aim was to compare the effectiveness of the two methods (ABC vs. 5A) against each other  
34 regarding all outcomes. All analyses were adjusted for a priori defined potentially relevant  
35 confounders and by using imputed patient data for missing data on confounding variables. Main  
36 analyses were double-checked using complete cases patient data.

37

38 **RANDOMISATION AND MASKING**

1 Two different methods of randomisation were applied, depending on how many GPs were available  
2 for the scheduled training dates (six training cycles over the course of two years, with two trainings –  
3 5A and ABC – per cycle): computer-generated block randomisation, or randomisation by virtue of the  
4 GPs temporal availability. GPs could not be fully blinded with respect to their training allocation.  
5 Patients were blinded to the nature and aim of the study until the end of the data collection.

6

## 7 **RESULTS**

8 52 GP practices (with 69 GPs) participated in the training and data collection (ABC training: 27 GP  
9 practices, 5A training: 25 GP practices). Of 5,406 unique patients who routinely consulted their GP  
10 within 5 weeks prior/post training and provided informed consent to participate, 1,937 (35.9%) were  
11 current tobacco smokers. Of these, 1,039 were interviewed prior to, and 898 following, the training.  
12 The rates of stop-smoking advice delivered by GPs (primary outcome) increased from 13.1%  
13 (n=136/1,039) to 33.1% (n=297/898) following the training (adjusted odds ratio (aOR)=3.25, 95%  
14 confidence interval (CI)=2.34 to 4.51). Overall, recommendation/prescription rates of cessation  
15 treatment were low a priori (<2%), but had increased after the training (e.g., behavioural counselling:  
16 aOR=7.15, 95%CI=4.02 to 12.74; any pharmacotherapy: aOR=7.99, 95%CI=4.11 to 15.52). The  
17 increase in rates of stop-smoking advice following the training was higher in the ABC vs. 5A group  
18 (aOR=1.71, 95%CI=0.94 to 3.12), but the difference failed to be statistically significant (p=0.08).

19

## 20 **CONCLUSIONS**

21 Our brief training offers a highly effective strategy to improve the delivery of evidence-based  
22 smoking cessation advice in general practice. ABC seems to be more feasible to apply for GPs during  
23 routine consultations. Approaches to further increase the delivery of stop-smoking advice, and  
24 upscaling implementation strategies for the ABC training in general practice, should be evaluated.

25

## 26 **TRIAL REGISTRATION**

27 German Clinical Trials Register (DRKS00012786); registered on 22<sup>th</sup> August 2017, prior to the first  
28 patient in.

29

## 30 **Keywords**

31 Tobacco addiction, primary care, general practitioner, brief smoking cessation advice, national  
32 clinical guideline, 5A, ABC, very brief advice

33

## 1    **WHAT IS ALREADY KNOWN ON THIS TOPIC**

- 2        • Systematic review evidence shows that brief physician stop-smoking advice increases the  
3            likelihood that smokers attempt to quit and become abstinent, particularly if offered together  
4            with evidence-based smoking cessation treatment.
- 5        • Clinical guidelines recommend such advice to be routinely delivered by primary care  
6            physicians (general practitioners, (GPs)), but the implementation of these recommendations  
7            by GPs in Germany – a country where approximately one third of the population still smokes  
8            tobacco - is low.
- 9        • A strategy is needed to overcome barriers preventing GPs from routinely providing stop-  
10           smoking advice, such as a lack in knowledge and skills. No experimental study has evaluated  
11           such a strategy in German general practice so far.
- 12       • Two methods of brief stop-smoking advice exist – 5A (ask, advice, assess, assist, arrange) or  
13           ABC (ask, brief advice, cessation support) – but it is unclear which method can be more  
14           effectively implemented by trained GPs.

## 16    **WHAT THIS STUDY ADDS**

- 17       • This cluster randomised controlled trial evaluated the effectiveness of a 3.5h-training for GPs  
18           in providing brief stop-smoking advice and compared two different methods (ABC vs. 5A) on  
19           the rates of delivery of such advice and recommendations of evidence-based cessation  
20           treatment in 1,937 smoking patients from 52 GP practices in Germany.
- 21       • The training, irrespective of the training method, was strongly associated with an increase in  
22           the rates of GP delivered advice and recommendation of evidence-based smoking cessation  
23           treatment.
- 24       • The data suggests that a training according to ABC is more effective than 5A in increasing the  
25           rates of GP delivered stop-smoking advice.
- 26       • Upscaling and implementation strategies should be evaluated for the ABC training in German  
27           general practice.

28  
29

## 1 INTRODUCTION

2 Brief advice about quitting tobacco smoking, delivered by healthcare professionals is effective in  
3 provoking a quit attempt and increase the likelihood that this attempt will be successful.<sup>1</sup> Moreover,  
4 brief advice is highly cost-effective since it does not require any particular equipment.<sup>2</sup> However,  
5 effects of simple advice alone are relatively small.<sup>1</sup> Combining such advice together with evidence-  
6 based pharmacological (e.g., nicotine replacement therapy (NRT), varenicline or bupropion) or  
7 behavioural (e.g., outpatient single or group intervention) smoking cessation therapy substantially  
8 increases long-term abstinence rates.<sup>3 4</sup> National and international clinical guidelines<sup>5-7</sup> thus strongly  
9 recommend that healthcare professionals should routinely give brief stop-smoking advice to every  
10 smoking patient and provide evidence-based treatment. Primary care physicians play a pivotal role in  
11 smoking cessation since the majority of smokers visits their general practitioner (GP) at least once a  
12 year.<sup>8</sup> Hence, from a public health perspective the routine provision of brief advice in general practice  
13 care can substantially contribute to the reduction of the absolute numbers of smokers.

14 However, the implementation of guideline recommendations on the treatment of tobacco addiction in  
15 Germany is rather poor. Only about 18% of smokers report the receipt of brief advice to quit smoking  
16 during their last consultation, and barely 4% report the offer of an evidence-based smoking cessation  
17 treatment.<sup>8</sup> Only every fifth smoker in Germany makes at least one attempt to quit smoking per year,  
18 and barely 13% of these attempts are supported with an evidence-based cessation aid.<sup>9</sup> Thus, the  
19 majority of smokers miss a prime opportunity to quit harmful tobacco consumption.

20 Central barriers of GPs to the provision of brief advice on smoking cessation include the lack of  
21 training or education in the delivery of effective advice to quit, and the lack of time to provide advice  
22 during routine consultations.<sup>10-14</sup> Such training is not implemented by default in the education of  
23 medical students in Germany, and postgraduate trainings are optional, costly, and time consuming.  
24 The lack of the opportunity to offer treatment at no costs may further lower the GPs' motivation to  
25 deliver such advice, since evidence-based cessation therapy is not fully reimbursed in Germany.

26 Systematic review evidence supports the effectiveness of training health professionals in providing  
27 smoking cessation advice on the point prevalence of smoking, continuous abstinence and professional  
28 performance.<sup>15</sup> Accordingly, guidelines for the implementation of Article 14 of the World Health  
29 Organization Framework Convention on Tobacco Control recommend the routine integration of brief  
30 stop-smoking advice into all healthcare systems, and ensuring that healthcare workers are trained to  
31 provide such advice to their smoking patients.<sup>16</sup> However, only few trials on the effectiveness of such  
32 trainings have been conducted in general practice settings.<sup>15</sup> These studies show positive training  
33 effects on the rates at which GPs deliver brief stop-smoking advice,<sup>17 18</sup> refer to smoking cessation  
34 services,<sup>19</sup> and on GP-reported knowledge, self-efficacy, and attitude regarding the delivery of brief  
35 smoking cessation counselling.<sup>18 20</sup>

1 The duration of the trainings in these studies varies between 40 minutes<sup>19 21</sup> and several days,<sup>18</sup>  
2 whereby multi-day trainings demand additional time which might lower the GPs' motivation to  
3 participate. Regarding the training effect on the rates of GP delivered smoking cessation treatment,  
4 the study of Girvalaki et al.<sup>18</sup> showed a positive effect of a full-day training and two 3-hour refresher  
5 sessions on the rate of provided behavioural and pharmacological smoking cessation treatment,  
6 whereas the one-hour intervention of Verbiest et al. could not improve prescription rates of  
7 pharmacotherapy.<sup>17</sup>

8 So far, only one cluster randomised trial on the effectiveness of a smoking cessation training for GPs  
9 has been conducted in Germany, comparing the effect of a brief training together with either financial  
10 incentives for the GPs, or for the patients' use of pharmacological therapy on 12-month tobacco  
11 abstinence.<sup>22</sup> From these data, no conclusion can be drawn regarding the unique effect of the training.

12 Brief stop smoking counselling can be structured in many ways. Very brief methods such as the 3A  
13 (ask, advice, assist/act) or the ABC method (ask, brief advice, cessation support) are often  
14 recommended internationally,<sup>23-25</sup> whereas in Germany the 5A method is more traditionally used: ask  
15 (for the smoking status of the patient), advise (urge the smoker to quit), assess (motivation to quit),  
16 assist (provide evidence-based cessation treatment), and arrange (follow-up contacts).<sup>5</sup> According to  
17 the 5As, only smokers willing to quit receive the final steps "assist" and "arrange". For smokers  
18 unmotivated to quit, which applies to most smokers at the time of the consultation,<sup>26 27</sup> GPs are  
19 recommended to provide an additional brief intervention to enhance the motivation to quit (the 5Rs<sup>5</sup>).  
20 Although associations between the last two steps of 5A and success in quitting were shown to be  
21 strongest,<sup>28</sup> both steps are only rarely applied,<sup>29 30</sup> probably because discussions with smokers about  
22 their willingness to quit are too time-consuming and unsuccessful during routine consultations. Thus,  
23 many smokers would not be offered evidence-based treatment to quit smoking, and may be less likely  
24 to use such treatment when feeling motivated and attempting to quit at a later stage.

25 The German clinical guideline<sup>7</sup> for treating tobacco addiction recommends the provision of either  
26 method (ABC or 5A). So far, no studies comparing the effectiveness of both methods on the rates of  
27 delivery of brief-stop smoking advice in general practice settings, and thus no recommendation can be  
28 made to favour one method over the other. Although, it can be assumed that the ABC approach is  
29 more convenient to apply for GPs in daily practice. We therefore developed and pre-tested two 3.5h-  
30 trainings for GPs in delivering such advice during routine consultations: one based on the 5As and  
31 one based on the ABC approach.<sup>31</sup> The aim of the present study was to assess whether our trainings  
32 provide an effective strategy to improve the implementation of the clinical practice guideline  
33 recommendations for the treatment of tobacco addiction by increasing the patient-reported rates of GP  
34 delivered brief stop-smoking advice (primary outcome) and the recommendation/prescription rates for  
35 evidence-based smoking cessation treatment (secondary outcomes) A secondary aim was to compare  
36 the effectiveness of both methods (ABC vs. 5A) against each other.



## 1   **METHODS**

### 2   **Trial design**

3   Detailed information on the development and pilot testing of the intervention and on the results of a  
4   qualitative process evaluation have been previously published in a protocol.<sup>31</sup> Non-adherence to the  
5   study protocol, if applicable, will be reported throughout this manuscript and extensions to planned  
6   statistical analyses will be reported under the corresponding “non-adherence” paragraph. In brief, we  
7   conducted a pragmatic, 2-arm cluster randomised controlled trial with a pre-post-design for the  
8   primary outcome (evaluation of the effectiveness of a training on the delivery rates of brief stop-  
9   smoking advice during routine consultations with smoking patients) and with cluster randomisation  
10   for the comparison of the effectiveness of both training methods – ABC and 5A – against each other.  
11   The study protocol was approved by the ethics committee of the Medical Faculty at the Heinrich-  
12   Heine-University (HHU) Düsseldorf, Germany (5999R). All participants (GPs, patients) gave written  
13   informed consent. GP practices were randomised between 22 June 2017 and 15 March 2019. The  
14   study has been registered at the German Clinical Trials Register (DRKS00012786).

15   The study consisted of six study cycles. According to the study protocol, a study cycle was initially  
16   defined as a period of eight weeks: four weeks pre-training data collection followed by the training  
17   (intervention) and then four weeks post-training data collection. In order to minimise sampling bias  
18   which might be aligned with considerable fluctuations in patient flow among different practice days  
19   or weeks (e.g., on Mondays, during a flu epidemic, or on public holidays), data collection was carried  
20   out on approximately seven varying GP office days during the four-week pre-training period and on  
21   seven days during the four-week post-training period. However, in some practices with lower daily  
22   patient visits, this period had to be extended to up to six weeks with up to 10 days of data collection  
23   prior and following the training. Per cycle, two trainings were carried out, one according to each  
24   method.

### 25   **Participants**

#### 26   *GP practices*

27   GP practices were recruited by postal dispatch from the publicly accessible online medical register of  
28   the regional Association of Statutory Health Insurance Physicians North Rhine in the Rhine-Ruhr  
29   Metropolitan Region of the German federal state North Rhine-Westphalia: a densely populated,  
30   polycentric urban agglomeration area with a strongly intercultural shaped population structure and  
31   economic inequalities, as well as from the practice network of the Institute of General Practice of the  
32   HHU Düsseldorf, Germany. Practices interested in participation were contacted by phone and fax  
33   messages in all following conversations. According to the study protocol,<sup>31</sup> all GPs from group or  
34   single practices were eligible except for those specialised in treating substance abuse or in  
35   psychotherapeutic care, or those who have been trained in providing smoking cessation support within  
36   the last five years. However, since many GPs in Germany provide psychosomatic or



1 psychotherapeutic care, this exclusion criterion would have substantially lowered the number of  
2 eligible GP practices. Thus, contrary to the protocol, these GPs were not excluded from participation  
3 but their patients were only recruited following routine GP consultation, never following  
4 psychotherapeutic consultations.

5

#### 6 *Patients*

7 Data on the primary and on most secondary outcomes was collected in tobacco smoking patients  
8 consecutively consulting their GP within a period of six weeks prior and six weeks following the  
9 training by means of questionnaire-guided, face-to-face interviews in all consecutive patients  
10 immediately following GP consultation in the setting of the practice. Data collection was carried out  
11 by four part-time researchers. Per study cycle, each of them managed to collect data in two or three  
12 practices. Prior to the consultation with the GP, patients were informed about, and invited to  
13 participate in the study by the researcher. At this time, all patients (independently of their smoking  
14 status) were invited to participate, and patients did not receive full information about the real purpose  
15 of the study (detailed information on blinding in the corresponding paragraph). Although it was not  
16 intended, in several practices, the GP repeatedly asked some of the smoking patients to participate in  
17 the study. Following the GP consultation, the interviews were conducted in a separate room. All  
18 patients were asked to answer questions on their sociodemographic characteristics and their current  
19 tobacco smoking status. Current tobacco smoking was defined as smoking cigarettes (including hand-  
20 rolled or self-stuffed) daily or occasionally, or any other combustible tobacco (pipe, cigars, cigarillos,  
21 shisha). For non-smokers, the interview ended at this point, whereas for current smokers the interview  
22 was continued with questions on their smoking behaviour, and on the outcomes of this study. In  
23 current smokers, the interview took approximately 10 to 15 minutes. The full baseline questionnaire  
24 can be found here: [osf.io/f2p7b/](https://osf.io/f2p7b/) (translated English version), [osf.io/7pmr5/](https://osf.io/7pmr5/) (original German version).

25 Per protocol, patients younger than 18 years, those suffering from moderate or severe cognitive  
26 impairment, those with language barriers or of too low literacy to understand the patient informed  
27 consent form, or those who did not see their GP in person (e.g., just picking up a prescription) were  
28 not eligible to participate. Although not explicitly mentioned in the protocol,<sup>31</sup> patients using only  
29 electronic cigarettes or heated tobacco products were also not eligible to participate.

#### 30 **Randomisation and masking**

31 Cluster randomisation was used because the intervention (training) was delivered at the practice level.  
32 Per study cycle two small-group trainings – one per training method – were offered resulting in 12  
33 trainings in total (six in ABC, six in 5A). GPs from the same practice were assigned to the same  
34 training. In case a GP had to cancel the training, she or he was re-assigned to the same training  
35 including post-training data collection at the following study cycle. In group practices, only patients  
36 from GPs participating in the study were included. The minimum number of participants to run the  
37 training was set at three, which occurred once due to short-term drop-outs. The maximum number was

1 set at ten participants, which still allows intensive practical training. However, one training was  
2 conducted with 12 GPs due to large group practices who were randomised to the same training.

3 To yield a maximum participation rate, three to four potential training dates were offered, outside  
4 common GPs' practice opening hours. GPs had to register for at least two dates to participate.  
5 Depending on how many GPs were available at least at two of the proposed training dates, two  
6 different methods of randomisation were applied:<sup>31</sup>

- 7 • Eight or more GPs: computer-generated block randomisation with random permuted blocks of  
8 sizes two or four, prepared by an independent statistician (WV), and concealed from the study  
9 team.
- 10 • Fewer than eight GPs: randomisation by virtue of the GPs temporal availability, meaning that the  
11 two dates with most registrations were selected and, in a random order between the study cycles  
12 one was assigned to be an ABC and the other a 5A training.

13

14 GPs could not be fully blinded to their training allocation, but we neither give detailed information on  
15 both training methods nor on their group allocation until the end of the pre-training data collection.<sup>31</sup>

16 Patients were fully blinded to the nature and aim of the study until the end of the data collection. The  
17 study was masked as a study on "physician-patient communication on health behaviour" in the initial  
18 informed-consent form. Following the data collection, patients received full information on the  
19 purpose of the study, a strategy that was approved by the ethics committee.

20 As described in the protocol,<sup>31</sup> it was not feasible to blind the researchers who collected the data to the  
21 GPs' group allocation, but they were not actively involved in the trainings, and were alternately  
22 assigned to the GP practices for data collection as well as depending on the travel distance between a  
23 practice and their personal residence.

## 24 **Procedures (Interventions)**

25 In 2016, we developed a standardised 3.5h-training for GPs in delivering brief stop-smoking advice  
26 during routine practice consultations according to two different methodological approaches: ABC and  
27 5A. The theoretical foundation of this training is based on the "COM-B" behaviour change model<sup>32</sup>  
28 The training was designed to address at least two components (**capability** and **motivation**) of the  
29 COM-B model which, according to the model, influence the performance of **behaviour**. Since the  
30 ABC approach seems to be less difficult and less time consuming to apply for GPs during routine  
31 consultations, we assumed that the training according to ABC might also influence the third  
32 component "opportunity" of the COM-B model. We used the Behaviour Change Techniques (BCT)  
33 Taxonomy<sup>33</sup> to describe the active components of our training which might have the potential to alter  
34 the GPs' behaviour. BCTs are reported in the study protocol.<sup>31</sup>

35 According to the training manual, trainings were always led by a senior researcher of the study centre  
36 together with an experienced GP peer-trainer who both rotated between ABC and 5A trainings.

1 Overall, three different researchers and four GPs served as trainers. Each training session started with  
2 an introductory lecture of approximately 60 min according to national and international guidelines on  
3 smoking cessation. This lecture included the latest evidence on the development of tobacco addiction,  
4 effective smoking cessation treatments, details about the specific method of providing stop-smoking  
5 advice (either ABC or 5A), and reflexive group discussions on GPs' experience with barriers and  
6 facilitators of the provision of stop-smoking advice. The lecture was followed by about 90 min  
7 simulated role-plays, including moderated peer feedback, with professional actors trained in patients'  
8 specific behaviour, enabling the GPs to practice the delivery of brief stop-smoking advice according  
9 to ABC or 5A. GPs received one-page handouts on the structure the respective method, on evidence-  
10 based smoking cessation treatments, and a copy template with local outpatient programs, quit  
11 smoking websites and hotlines to which patients can be referred to. These handouts were developed as  
12 a result of the process evaluation following the pilot study.<sup>31</sup> Participation in training was incentivised  
13 with five Continuing Medical Education credits.

14

## 15 **Outcome measures**

### 16 *Primary outcome*

17 We published a tabular overview of the pre-specified outcomes online together with the statistical  
18 analyses plan: [osf.io/36kpc/](https://osf.io/36kpc/) (version 3-3). The primary outcome is defined as the number of patients  
19 prior to and following the training who report the receipt of brief stop-smoking advice during the last  
20 consultation with their GP, irrespective of the training method, out of the total number of patients who  
21 stated to be current smokers at the time of the consultation. Brief stop-smoking advice was assessed  
22 by asking the patient whether the GP urged him or her to quit smoking during this consultation.

23

### 24 *Secondary outcomes*

25 Most secondary outcomes refer to the patients' last consultation with their GP, and were measured  
26 together with the primary outcome. The following secondary outcomes were defined as the number of  
27 smoking patients prior to and following the training who, irrespectively of the training method, report  
28 the receipt of GP delivered prescription or recommendation of:

- 29 • individual or group behavioural counselling in own practice or elsewhere,
- 30 • NRT,
- 31 • varenicline or bupropion,
- 32 • any pharmacotherapy (NRT, varenicline or bupropion),
- 33 • a combination therapy of behavioural counselling and pharmacotherapy,
- 34 • and to directly compare the effectiveness of the ABC and the 5A method (interaction with pre  
35 vs. post measurement) by means of the primary and secondary outcomes.

1 Together with the baseline data collection data on sociodemographic characteristics (age, sex, level of  
2 education) of all patients was collected. Among current smokers, further data was collected on  
3 smoking behaviour: average number of cigarettes (or, e.g., pipes, cigars) smoked per day, week or  
4 month (for occasional smokers), motivation to stop smoking (German version of the Motivation to  
5 Stop Smoking Scale, MTSS)<sup>26</sup>, and on their urges to smoke (German version of the Strength of Urges  
6 to Smoke Scale, SUTS)<sup>34</sup>. Patients reporting the receipt of any brief smoking cessation advice were be  
7 asked about their satisfaction with that conversation; operationalised by ratings on a 6-point Likert  
8 scale ranging from 1 = “very satisfied” to 6 = “very dissatisfied”).

9 Further secondary outcomes were measured by means of brief postal follow-up questionnaires at  
10 week 4, 12, and 26 following the consultation with the GP among those who were smoker at baseline.  
11 These data included attempts to quit smoking, the use of evidence-based or non-evidence-based  
12 smoking cessation methods (e.g., acupuncture, hypnosis) used to support this attempt, and point  
13 prevalence abstinence rates, but are not subject of the present analyses.

14 Data on GP characteristics (including age, gender, smoking status, professional experience, and  
15 specialisation), and on characteristics of the practice (e.g., location rural vs. urban, average number of  
16 patients per calendar quarter) were collected immediately following randomisation. Data on short-  
17 term training effects on GPs’ self-reported attitude towards (motivation), opportunity, knowledge on,  
18 and practical skills (capability) in the provision of brief advice to quit tobacco consumption was  
19 collected in accordance with the “COM-B” behaviour change model<sup>32</sup> by means of a brief  
20 questionnaire prior to and immediately following the training.

21

## 22 **Statistical analysis**

23 The primary outcome for this study was the percentage of smokers reporting the delivery of brief  
24 stop-smoking advice by their GP during routine consultation from prior to following the training. The  
25 sample size calculation was informed by data from our previous study of the German population<sup>8</sup>  
26 showing that about 18% of smokers in Germany are currently receiving brief advice on smoking  
27 cessation during a consultation with their GP. From the pilot study<sup>31</sup> we assumed that it would be  
28 feasible to recruit 48 GP practices in total during a period of about two years. Training GPs in either  
29 the ABC or 5A method was assumed to have a clinically relevant effect if it increases these rates by at  
30 least 10% (corresponding to an odds ratio of 1.77) between pre- and post-training. A simulation study  
31 showed that 16 patients (respectively eight prior to and eight following the training) per practice were  
32 needed to evaluate the primary outcome with a statistical power of at least 80%, and a total of 42  
33 patients (respectively 21 prior to and 21 following the training) per practice were needed to evaluate  
34 the interaction effect between the time (pre-post training) and the group variable ABC vs. 5A (for  
35 which we assumed post-training percentages of 33% and 23%, respectively), resulting in a total study  
36 sample size of 2,016 patients (respectively 1,008 prior to and 1,008 following the training). Further  
37 details on the sample size calculation are reported in the protocol<sup>31</sup>

1

## 2 *Descriptive statistics*

3 Sociodemographic baseline data of GPs and patients are described for each group separately for the  
4 pre- and post-training assessment and for both study arms (**Table 1 and 2**). Continuous variables are  
5 presented with means and standard deviations, whereas categorical variables are denoted in numbers  
6 and percentages together with 95% confidence intervals (95% CI).

7

## 8 *Analyses of primary and secondary outcomes*

9 To fully mask the statistician and the researchers involved in the statistical analyses of outcomes, we  
10 wrote the code for the present analyses prior to the analyses and based on a blinded dataset; i.e., with  
11 the values of the primary (pre vs. post training measurement) and secondary exposure variables (ABC  
12 vs. 5A training method) in a randomly shuffled order. All analyses were conducted using R version  
13 3.6.1.<sup>35</sup> The analysis plan (latest version 3.3) and R code (latest version 3.6) can be found at the Open  
14 Science Framework: [osf.io/36kpc/](https://osf.io/36kpc/), [osf.io/zurfq/](https://osf.io/zurfq/).

15 Data are structured hierarchically in clusters (= practices), with patients within these clusters. Since  
16 differences in rates of delivery of smoking cessation advice were expected among practices, mixed-  
17 effects logistic regression models were used to analyse the dichotomous primary outcome (received  
18 advice: yes vs. no), with a fixed effect for time (dichotomous: pre- vs. post training) and random  
19 effects for the practices and the time effect. The same model was applied to the secondary outcomes.  
20 All models were adjusted for potential confounders measured at baseline including patients' age, sex,  
21 level of education, time spent with urges to smoke, and strength of urges to smoke.

22 In order to analyse differences between the ABC and 5A training, the dichotomous group variable and  
23 its interaction with time (pre-post training) were added to the models as fixed effects. In both models,  
24 the time effect and the interaction were analysed by means of Wald-type tests (level of significance  
25 .05).

26 All participating patients were included in an intention-to-treat analysis. Since missing data on  
27 primary and secondary outcomes was very rare, no imputation methods were applied; see also  
28 paragraph "adherence to the protocol". Missing data of potential confounding variables in contrast  
29 was imputed by using a multiple imputation approach, with missing data imputed by chained  
30 equations using the "mice-package"<sup>36</sup> in R with m=20 imputed datasets and 10 iterations for each  
31 dataset. Results across the imputation datasets were pooled using Rubin's rules<sup>37</sup>. To examine the  
32 sensitivity of the results, an additional complete case analysis was performed for the primary outcome  
33 as well as for the interaction effect between group (ABC, 5A) and time (pre-post measurement).

34

## 35 **Adherence to the protocol**

1 Smaller changes to the published study protocol regarding the data collection and GPs exclusion  
2 criteria are reported in the corresponding paragraphs throughout this manuscript.

3 All planned statistical analyses were reported in the study protocol and in the analysis plan published  
4 prior to the conducted analyses (latest version 3.3, [osf.io/36kpc/](https://osf.io/36kpc/)). A few changes made to planned  
5 analyses including explanations were also provided within this document. In brief, we did not adjust  
6 the analyses for the “motivation to stop smoking” since motivation was assessed following the  
7 consultation with GP and might thus already be influenced by the behaviour of the GP during the  
8 consultation. Furthermore, we did not perform a complete case analysis for the primary outcome,  
9 since missing data was very rare (only 4 cases). For all adjusted analyses, missing data of potential  
10 confounders was imputed to reduce the potential for bias compared to a complete case analysis.

11 Two additional secondary outcomes were assessed: an aggregate variable of all forms of patient-  
12 reported receipt of GP recommendation/prescription for pharmacotherapy (NRT, varenicline or  
13 bupropion) and the receipt of a combination therapy (pharmacotherapy and behavioural counselling).  
14 This decision was made since usage of stop-smoking medication is very low in Germany,<sup>9</sup> and  
15 because the combination therapy is recommended in the national clinical guideline.<sup>7</sup>

16 We further ran explorative subgroup analyses for the primary outcome with patient data (sex, level of  
17 education, and number of cigarettes smoked per day:  $\leq 10$  vs.  $>10$ ) and GP data (sex, number of years  
18 in clinical practice, practice type, smoking status: ever vs. never smoker), but results are only reported  
19 if the interaction effect (subgroup variable x exposure variable) was statistically significant at  $p < 0.05$ .  
20 Details on these group comparisons can be also found in the analyses plan ([osf.io/36kpc/](https://osf.io/36kpc/)).

21

## 22 **Patient and public involvement**

23 The trial procedure and all aspects of the intervention (GP training), including the clinical vignettes  
24 for the role-plays, were developed in an interdisciplinary team of health care researchers, experienced  
25 GPs, and actors trained in professional patient-physician communication. During the pilot study,  
26 which was conducted in 13 GP practices,<sup>31</sup> the intervention and methods of data collection in patients  
27 were tested and reviewed, and feedback was obtained by means of a process evaluation in  
28 participating GPs regarding barriers and facilitators to transfer the content of the intervention into  
29 their daily practice routine. Methods of data collection in patients and comprehensibility of the  
30 questions to assess the primary and secondary outcomes were also reviewed during the pilot study.

31

32

## 33 **RESULTS**

34 **Figure 1** shows the trial flow of participating GPs and their smoking patients. Between June 2017 and  
35 May 2019, 5,761 study invitation letters were sent to addresses of GPs from single and group  
36 practices. A total of 106 practices responded, with at least one GP per practice who was generally



1 interested to participate in the study. For 26 of these practices, no initiation telephone call could be  
2 arranged with the GP in person to provide detailed information on the study procedures. Following a  
3 telephone call with GPs from the remaining practices, one GP did not meet the inclusion criteria and 21  
4 GPs refused to participate due to time constraints, or a lack of providing a separate room for the data  
5 collection patient interviews. Finally, 58 practices with 78 GPs were eligible, provided informed  
6 consent, and thus received a study ident number. Two practices with three GPs withdrew before the  
7 start of the randomisation, hence a total of 56 practices (75 GPs) were randomly assigned to either an  
8 ABC or 5A training, a number which was slightly higher than originally intended.

9 During the process of the study, further GPs had to be sporadically excluded because they did not  
10 participate in the training or in both periods of data collection (**Figure 1**). A total of 52 practices (69  
11 GPs) were finally included in the statistical analyses. **Table 1** presents baseline sociodemographic and  
12 professional characteristics of this GP sample stratified by training method.

13 **Table 2** presents baseline sociodemographic of all patients of these GP practices who participated in  
14 the study and who were current tobacco smokers at that time, stratified by pre-post data collection  
15 period and by training method of the GP they had consulted. In total, 1,937 smoking patients  
16 participated of whom 1,037 patients were interviewed prior to the GP training and 898 patients  
17 following the GP training. The latter sample size was slightly lower than intended because some  
18 patients, i.e. those with acute diseases, visited their GP multiple times over several weeks, minimising  
19 the selection of unique patients within the second period of data collection.

20 Patients reporting the receipt of brief smoking cessation advice indicated that they were satisfied with  
21 that conversation with their GP, and no relevant differences regarding this satisfaction and in patient  
22 characteristics were observed between the patient samples prior to and following the GP training and  
23 between the samples of the two GP training methods ABC and 5A (Table 2).

24

## 25 **Primary outcomes**

26 **Table 3** presents the results for the analysis of the primary outcome. The absolute rates of patient-  
27 reported receipt of brief advice to quit smoking delivered by their GP increased from 13.1% (n = 136)  
28 prior to the training to 33.1% (n = 297) following the training (adjusted odds ratio (aOR) = 3.25, 95%  
29 confidence interval (CI) = 2.34 to 4.51, p<0.001). This result remained stable when using complete  
30 case patient data for the analyses (aOR = 3.28, 95%CI = 2.35 to 4.59), in which patients with missing  
31 data on potential confounding variables were excluded (missing cases per variable: age: n = 2 (0.1%),  
32 level of education: n = 2 (0.1%), time spend with urges to smoke: n = 118 (6.1%), strength of urges to  
33 smoke<sup>34</sup>: n = 122 (6.3%)).

34

## 35 **Secondary outcomes**



1 **Table 3** also presents the results for the analyses of secondary outcomes. Overall, the patient-reported  
2 rates of recommendation/prescription of evidence-based treatment for smoking cessation delivered by  
3 their GP were low prior to the training (<2%), but increased significantly for all types of treatment  
4 after the training, with aOR's ranging from 7.15 (95%CI = 4.02 to 12.74) for behavioural counselling  
5 to an odds ratio of 15.45 (95%CI = 5.67 to 42.10) for NRT. Following the training, patients were also  
6 more likely to report the receipt of a recommendation/prescription for the combination of behavioural  
7 counselling and pharmacotherapy to quit smoking from their GP (aOR = 4.36, 95%CI = 2.46 to 7.73).

8  
9 Regarding the effectiveness of the two training methods (ABC vs. 5A) for the primary outcome, a  
10 higher increase in the rates of stop-smoking advice following the training was observed in patients  
11 whose GP were trained in the ABC method compared to those whose GP were trained in the 5A  
12 method (aOR=1.71, 95%CI=0.94 to 3.12), although the difference failed to be statistically significant  
13 (p=0.08). This result remained stable when using complete case patient data for the analyses  
14 (OaR=1.69, 95%CI=0.91 to 3.12).

15 The increase in patient-reported rates of recommendations or prescriptions of single or group  
16 behavioural support delivered by the GPs following the training was higher in the ABC vs. 5A group  
17 (aOR=4.59, 95%CI=1.40 to 14.98). According to the data, no such advantage could be observed for  
18 the ABC method regarding the recommendation/prescription rates of pharmacological smoking  
19 cessation treatments or the combination of behavioural counselling and pharmacotherapy (**Table 3**).  
20 One model (for recommendation of varenicline or bupropion) could not be fitted due to perfect  
21 separation (prior to the training, no such recommendation was ever provided in the ABC group,  
22 increasing to 3.1% after the training, while the pre- and post-training percentages remained relatively  
23 stable at 1.4% and 1.6%, respectively, in the 5A group).

#### 24 **Subgroup analyses**

25 Explorative subgroup analyses for the primary outcome revealed a significant (p=0.025) interaction  
26 for the GPs' number of years working in clinical practice (below group median number of years ( $\leq 12$   
27 years) vs. above group median number of years (>12 years)), showing a higher increase of reported  
28 delivery of brief stop-smoking advice following the GP training in patients who had visited a GPs  
29 with more than 12 years of working experience (OR=4.63, 95%CI=2.93 to 7.33) compared to those  
30 who had visited a GP with less than 12 years in clinical practice (OR=2.33, 95%CI=1.49 to 3.64).

31

#### 32 **GP-reported training effects**

33 Data on short-term effects of the training on GPs' attitude (motivation), knowledge and practical skills  
34 (capability), and opportunity to provide brief stop-smoking are reported in **Supplementary Table S1**.  
35 Self-reported capability and opportunity in the provision of stop-smoking advice improved following  
36 the training, with all items increased by effect sizes between 0.58 and 2.84. The largest difference

1 from prior to following the training was observed for self-reported knowledge of the steps of a  
2 structured brief stop-smoking advice (mean difference=2.84,  $p<.001$ , Cohen's  $d=2.83$ ). No such  
3 training effect could be observed for motivation, which was already high prior to the training (mean  
4 difference=0.07 and 0.10). Following the training, 91.3% ( $n=63$ ) of the GPs agreed to implement brief  
5 stop-smoking advice more frequently in their daily practice (**Supplementary Table S2**). The majority  
6 (79.7%,  $n=55$ ) estimated their learning growth following the training to be high or very high.

7

## 8 **DISCUSSION**

### 9 **Principal findings of the study**

10 In this cluster randomised controlled trial with pre-post data collection in 1,937 smoking patients,  
11 GPs' participation in an 3.5h-training on the provision of brief stop-smoking advice according to the  
12 ABC or 5A method, including role-plays with professional actors and moderated by a senior  
13 researcher together with an experienced GP peer-trainer, was highly effective at increasing the rates of  
14 patient-reported receipt of such advice and recommendations of evidence-based smoking cessation  
15 treatment (behavioural, pharmacological, combination of both) delivered by GPs.

16 Regarding the difference in the effectiveness of ABC and 5A, the increase of patient-reported delivery  
17 of brief stop-smoking advice from prior to following the training seemed to be higher in GPs trained  
18 in the ABC method compared to those trained in 5A. According to the data, no advantage for one of  
19 the training methods was found regarding the patient-reported recommendation or prescription rates  
20 of evidence-based cessation treatment delivered by GPs. However, the overall recommendation rates  
21 of such treatment were very low, resulting in large confidence intervals and inconclusive results.

### 22 **Strengths and limitations of study**

23 Our data are strengthened by the pragmatic “real-life” study setting, the face-to-face collection  
24 method with low rates of missing data, and by the consistency of age, sex, educational level, and  
25 smoking behaviour between pre-training and post-training data collection period as well as between  
26 treatment arms. Moreover, the data has been assessed by means of patient reports, which has been  
27 shown to be more precise than self-reports of the physicians when measuring the efficacy of  
28 physician-delivered counselling on health behaviour changes.<sup>38</sup>

29 A detailed study protocol including results and lessons-learned from the pilot study has been  
30 published and all statistical analyses were planned a priori. The statistical analyses code was written  
31 on a dataset blinded for the primary and secondary exposure variables and published prior to the final  
32 data analyses, and thus aimed to yield a maximum transparency and validity of all conducted  
33 analyses. The number of GP practices included was slightly higher than originally intended, resulting  
34 in adequately powered statistical analyses for the primary outcome.

35 The recruitment rate of patients within these practices was marginally lower than expected since some  
36 patients recurrently visited their GP within both periods of data collection but could only participate

1 once. For all comparisons of the effectiveness of the ABC vs. the 5A training, the statistical analyses  
2 thus seemed to be slightly underpowered, which might be the reason that the difference between ABC  
3 and 5A on the delivery rates of stop-smoking advice failed to be statistically significant.

4 Trial GP practices represented practices Rhine-Ruhr Metropolitan Region of the of the German  
5 federal state of North Rhine-Westphalia (NRW) and can thus not be regarded as representative for all  
6 GP practices across Germany. However, NRW is the most populous state in Germany, with a broad  
7 socioeconomic variability and trial practices were located in urban as well as in rural areas. Data from  
8 a recent representative population survey in smokers in Germany found rates (~14%)<sup>8</sup> of GP delivered  
9 brief stop-smoking advice during the last visit of their GP strongly corresponding with the trial rates  
10 (~13%) prior to the training intervention, suggesting sound representativeness of the present data.

11 We chose patient-reported delivery of brief stop-smoking advice as primary outcome instead of using  
12 biochemically validated abstinence of smokers for example, since abstinence strongly depends on  
13 various factors such as the choice and use of methods to assist a quit attempt and can thus neither  
14 reflect the direct effectiveness of our training on GPs' stop-smoking counselling performance nor the  
15 effectiveness of both training methods in comparison on the same outcome. Moreover, only short-  
16 term effects of the intervention were analysed, which can be seen as a major limitation of the present  
17 study. Thus, whether or not long- term effects occur and whether or not smoking patients might  
18 benefit from this in terms of quit rates and success, needs to be determined.

19 Another important limitation of the present study is that only a minority of the GPs who were invited  
20 to participate could be enrolled because a large proportion did not answer the invitation or could not  
21 be reached. It may be that the participating GPs were a selected group, indicated by the fact that they  
22 were already highly motivated prior to the training and saw themselves in charge to provide cessation  
23 counselling to their smoking patients. However, data indicate that this high level of motivation is not  
24 related to an exceptional high level of activity regarding the delivery of advice to quit smoking or the  
25 recommendation of evidence-based smoking cessation treatment (<2% recommendation rates).

26 Data on primary and secondary outcomes was patient-reported and may thus not reflect the actual  
27 performance of GPs. Moreover, we can only indirectly compare the effectiveness of ABC vs. 5A,  
28 since in this pragmatic setting it could not be verified that GPs have effectively implemented the  
29 corresponding method. The most optimal method of data collection would have been video  
30 observation during the consultation, a procedure which would not have been feasible in this study.  
31 Collecting the data by means of face-to-face interviews and immediately following the consultation  
32 with the GP was the next best realisable alternative, also minimising recall bias and difficulties in  
33 terms of understanding the interview questions. The presence of a researcher of the study team itself  
34 might have influenced the GPs' performance leading to higher delivery rates of brief-stop-smoking  
35 advice. However, as described above, these rates strongly match with the rates of a recent population-

1 based study<sup>8</sup> and substantial changes between the pre- to post-training data collection period were  
2 observed although a member of the study team was present in the practice during both periods.

3 As described in the study protocol and due to the pragmatic nature of this study, it was not possible to  
4 fully blind the researchers who conducted the data collection. We therefore applied several strategies  
5 to reduce contamination. Researchers were, for example, required to avoid comments on the  
6 intervention (training and training method) while talking to GPs or patients, they were not actively  
7 involved in the trainings, and were randomly or assigned in relation to the distance of their personal  
8 residence to the GP practices for data collection.

9 Although otherwise intended, patients were not only recruited by the researcher of the study team. In  
10 several practices the GPs took the initiative and directly referred smoking patients to the “study  
11 room”. In terms of recruitment, this procedure was more successful than recruitment by the study  
12 researcher, but we cannot estimate the influence on the measured outcomes. However, GPs acting  
13 accordingly did not change this behaviour between pre- and post-training period of data collection.

#### 14 **Comparison with other studies**

15 Until to date, only few studies assessed the effectiveness of training GPs on the rates of delivery of  
16 evidence-based advice or counselling on smoking cessation<sup>17-19</sup>. Verbiest et al<sup>17</sup>. found that a one-hour  
17 group training aimed at decreasing personal and organizational barriers to provide brief advice to quit  
18 according to the 5A methods, increased the patient-reported frequency in which they asked their  
19 patients about their smoking status, and the GP-reported frequency in which the GPs advised them to  
20 quit smoking. No effect was observed regarding the provision of evidence-based pharmacotherapy or  
21 regarding the arrangement of a follow-up contact (GP- and patient-reported).

22 While our training was developed based on the COM-B theory on behaviour change, only the study of  
23 Girvalaki et al.<sup>18</sup> used a theory (Theory of Planned Behaviour) to guide the intervention design. Their  
24 quasi-experimental pilot study found that full-day group training with two 3-hour refresher trainings  
25 was highly effective in increasing the patient- and GP-reported rates of provided smoking cessation  
26 counselling according to the 5A method, including the discussion and prescription of stop-smoking  
27 medications. Odds ratios in this study seem to be even higher than in the present study, although the  
28 analyses were not adjusted for patient characteristics. The training duration was four times longer  
29 compared to our training.

30 The study of Unrod et al., in contrast, showed that a 40min individual training session on the 5A  
31 method might be even effective in substantially improving physicians’ implementation of all steps of  
32 the 5As in primary care.<sup>21</sup> However, this study as well as the study of McRobbie et al., which assessed  
33 the effectiveness of a group training with the same duration, did not particularly analyse prescription  
34 or recommendation rates of behavioural and pharmacological smoking cessation treatment but

1 discussions with the patients on smoking cessation medication<sup>21</sup> and referral rates to cessation  
2 services.<sup>19 21</sup>

3 In the German healthcare context, clinics providing behavioural group therapy are rare, particularly in  
4 more rural areas, and specialist stop smoking services as in the United Kingdom<sup>39</sup> do not exist. The  
5 GP therefore play a central role in not only providing brief advice to quit smoking but also in  
6 initiating evidence-based treatment including behavioural and pharmacological approaches. Our  
7 training therefore aimed at increasing the prescription and recommendation rates for such evidence-  
8 based therapies.

9 Although studies show that the implementation of the 5A's in primary care settings is usually  
10 inadequate, and the level of performance for the most effective steps of the 5A (assist, arrange) is  
11 usually lowest,<sup>29 30</sup> no studies comparing the effectiveness of the 5A approach vs. much briefer  
12 methods (3A, ABC) on the advice performance of GPs yet exist. A very early randomized controlled  
13 trial of Butler et al.<sup>40</sup> compared the effectiveness on cessation of motivational consulting, which is  
14 also part of the 5A approach, versus brief advice for smokers in general practice, but this advice did  
15 not include any further evidence-based steps such as cessation support. Our study is therefore the first  
16 comparing two different methods of brief counselling – ABC and 5A.

17 Comparable to a study of Bobak et al.<sup>20</sup>, who conducted a 3.5h-training for GP trainees, our training  
18 substantially increased the GP-reported capability and perceived opportunity to provide evidence-  
19 based brief stop-smoking advice during routine consultations, whereas motivation was high  
20 throughout. Although in our study only short-term effects were measured, in the study of Bobak et al.,  
21 this GP-reported effect remained stable even at three-month follow-up. No patient-reports on the  
22 counselling activity of their GPs were assessed by Bobak and colleagues.<sup>20</sup>

23 The present study further revealed that GPs with more years of working experience in clinical practice  
24 seem to benefit more from the training intervention with regard to their post-training delivery rates of  
25 brief stop-smoking advice. It can be assumed that more experienced GPs are more confident in their  
26 daily routine care and thus may have more time to apply new techniques.

## 27 **Conclusions and policy implications**

28 Our theory-based, 3.5h-training offers a highly effective and low-threshold strategy to improve the  
29 delivery of evidence-based smoking cessation advice in general practice. When comparing methods to  
30 provide such advice during routine GP consultations against each other (ABC vs. 5A), our data  
31 indicate that the ABC method might be more feasible to apply for GPs and thus might have a greater  
32 impact on the overall delivery of brief stop-smoking advice and recommendations for behavioural  
33 counselling to quit smoking (individual, group; in own practice or elsewhere) to decrease the national  
34 smoking prevalence. A corresponding recommendation regarding the ABC method will be proposed  
35 for the German clinical guideline<sup>7</sup> for treating tobacco addiction.

36

1 **Abbreviations**

2 BCT Behaviour Change Techniques

3 BMG "Bundesministerium für Gesundheit" (German Federal Ministry of Health)

4 CONSORT Consolidated Standards of Reporting Trials

5 cRCT Cluster randomised controlled trial

6 GPs General Practitioner

7 HHU Heinrich-Heine University

8 MTSS Motivation to Stop Scale

9 NRT Nicotine replacement therapy

10 SD Standard deviation

11 SP Standardised patient

12 SUTS Strength of Urges to Smoke Scale

13

14

15

## 1 **DECLARATIONS**

### 2 **Acknowledgements**

3 The authors would like to thank Federal Ministry of Health Germany, and all trial patients and general  
4 practitioners. In particular, we thank our GP peer trainers at the Institute of General Practice of the  
5 HHU Duesseldorf who were intensively involved in the development and provision of the training:  
6 Olaf Reddemann, Inken Blank, Detlef Maurer, and Elisabeth Gummersbach. We also thank our  
7 student assistants who contributed to the data entry and follow-up data collection in this trial: Esther  
8 Scholz, Sarah Fullenkamp, and Laura Schrobildgen. Stefanie Otten, trainer of the standardised  
9 patients, and her team (particularly Brigitte Keldenich-Bergstein, Michael Hoch, and Georg Hoeren)  
10 is thanked for their professional and motivated assistance with the role-plays in preparation of and  
11 during the trainings.

12

### 13 **Contributors**

14 DK had the original idea and acquired funding for the current study together with SK and VL, and co-  
15 wrote this manuscript. SK, VL, and DK developed and conducted the GP trainings. SK coordinated  
16 all study processes of the main trial including scheduling and organisation of the trainings, and  
17 developed and wrote this manuscript. WV, an independent statistician, conducted a simulation study  
18 for the sample size calculation of the study and prepared the randomisation sequence for block  
19 randomisation. He also prepared the statistical analysis code, and advised on statistical analysis plans  
20 together with DK and SK who finally conducted all statistical analyses and interpreted the data. JH,  
21 DL, SKH, and CF were mainly involved in all study processes regarding GP and patient recruitment  
22 and data collection (including data entry, data cleaning, and preparation of the trainings and of the  
23 study material). As a GP and peer trainer, OR was mainly involved in the final evaluation of the  
24 training manual and the didactic methods, and supported the trainings as a peer trainer. SW, RW, TR,  
25 and HM gave valuable feedback at the time of designing the trial, and commented on and added to the  
26 present manuscript.

27 All named authors contributed substantially to the manuscript and agreed on its final version. The  
28 corresponding author attests that all listed authors meet authorship criteria and that no others meeting  
29 the criteria have been omitted.

30

### 31 **Funding**

32 The study was funded by the German Federal Ministry of Health (grant number ZMVII-  
33 2516DSM221, governmental funding) who had no involvement in the design of the study, data  
34 collection, data analysis, data interpretation, or writing of the report. The corresponding author had  
35 full access to all the data in the study and had final responsibility for the decision to submit for  
36 publication.

37

### 38 **Competing interests**



1 All authors have completed the ICMJE uniform disclosure form at [www.icmje.org/coi\\_disclosure.pdf](http://www.icmje.org/coi_disclosure.pdf)  
2 and declare: support from the Federal Ministry of Health Germany for the submitted work. DK  
3 received an unrestricted grant from Pfizer for an investigator-initiated trial on the effectiveness of  
4 practice nurse counselling and varenicline for smoking cessation in primary care in 2009 (Dutch Trial  
5 Register NTR3067). HM has received honoraria for speaking at smoking cessation meetings and  
6 attending advisory board meetings that have been organised by Pfizer and Johnson & Johnson, TR has  
7 received honoraria from Pfizer, Novartis, Glaxo Smith Kline, Astra Zeneca and Roche as a speaker in  
8 activities related to continuing medical education and financial support for investigator-initiated trials  
9 from Pfizer and Johnson & Johnson, RW has undertaken research and consultancy for companies that  
10 develop and manufacture smoking cessation medications (Pfizer, Johnsons & Johnson, and Glaxo  
11 Smith Kline) and is an advisor to the UK's National Centre for Smoking Cessation and Training; no  
12 financial relationships with any organisations that might have an interest in the submitted work in the  
13 previous three years; no other relationships or activities that could appear to have influenced the  
14 submitted work.

15

#### 16 **Ethical approval**

17 The study protocol was approved by the local ethics committee of the Medical Faculty of the  
18 Heinrich-Heine-University Düsseldorf, Germany (5999R). Prior to the data collection and after full  
19 oral and written information on study processes, purposes, and on data protection, each participating  
20 general practitioner and each patient included in the study gave written informed consent for  
21 participation and publication.

22

#### 23 **Transparency statement**

24 The corresponding author affirms that the manuscript is an honest, accurate, and transparent account  
25 of the present study; that no important aspects of the study have been omitted; and that any  
26 discrepancies from the study as originally planned and registered have been explained.

27

#### 28 **Data sharing**

29 The data underlying this study are third-party data (de-identified participant data, syntax of statistical  
30 analyses) and are available to researchers on reasonable request from the corresponding author  
31 ([sabrina.kastaun@med.uni-duesseldorf.de](mailto:sabrina.kastaun@med.uni-duesseldorf.de)). The study protocol has been published. All proposals  
32 requesting data access will need to specify how it is planned to use the data, and all proposals will  
33 need approval of the trial co-investigator team before data release.

34

35

1 **Supplemental files**

2

3 **Supplementary table 1**

4 Changes in capability, opportunity and motivation to provide brief stop smoking advice to smoking  
5 patients from prior to following the training reported by 69 general practitioners (GPs) of 52 GP  
6 practices.

7

8 **Supplementary table 2**

9 Self-reported assessment of general practitioners (GPs) following the training regarding the relevance  
10 of the training content and their learning curve (N=69 GPs from 52 GP practices).

11

12 **Supplementary material 1:**

13 Original German version of the Baseline questionnaire for patients  
14 (BaselineSurvey\_ABCII\_German.pdf) can be downloaded here: [osf.io/7pmr5/](https://osf.io/7pmr5/).

15

16 **Supplementary material 2:**

17 Translated version of the Baseline questionnaire for patients into English  
18 (BaselineSurvey\_ABCII\_Engl.pdf) can be downloaded here: [osf.io/f2p7b/](https://osf.io/f2p7b/).

19

20

## 1 REFERENCES

- 2 1. Stead LF, Buitrago D, Preciado N, et al. Physician advice for smoking cessation. *Cochrane*  
3 *Database of Systematic Reviews* 2013
- 4 2. van Schayck OC, Pinnock H, Ostrem A, et al. IPCRG Consensus statement: tackling the smoking  
5 epidemic - practical guidance for primary care. *Primary Care Respiratory Journal*  
6 2008;17:185-93.
- 7 3. Stead LF, Koilpillai P, Fanshawe TR, et al. Combined pharmacotherapy and behavioural  
8 interventions for smoking cessation. *Cochrane Database of Systematic Reviews* 2016
- 9 4. Hartmann-Boyce J, Hong B, Livingstone-Banks J, et al. Additional behavioural support as an  
10 adjunct to pharmacotherapy for smoking cessation. *Cochrane Database of Systematic*  
11 *Reviews* 2019
- 12 5. Fiore MC, Jaen CR, Baker TB, et al. A Clinical Practice Guideline for Treating Tobacco Use and  
13 Dependence: 2008 Update - A US Public Health Service report. *American Journal of*  
14 *Preventive Medicine* 2008;35:158-76.
- 15 6. National Institute for Clinical Excellence (NICE). Smoking: acute, maternity and mental health  
16 services, Guidance PH48. 2013, <https://www.nice.org.uk/guidance/ph48> (accessed 17 Mar  
17 2020).
- 18 7. Arbeitsgemeinschaft der Wissenschaftlichen Medizinischen Fachgesellschaften (AWMF) S3  
19 Guideline “Screening, Diagnostics, and Treatment of Harmful and Addictive Tobacco Use”  
20 [S3-Leitlinie “Screening, Diagnostik und Behandlung des schädlichen und abhängigen  
21 Tabakkonsums”]. AWMF-Register Nr. 076-006. . 2015,  
22 <http://www.awmf.org/leitlinien/detail/ll/076-006.html> (accessed 07 Mar 2020).
- 23 8. Kastaun S, Kotz D. Ärztliche Kurzberatung zur Tabakentwöhnung – Ergebnisse der DEBRA  
24 Studie. *SUCHT* 2019;65:34-41.
- 25 9. Kotz D, Batra A, Kastaun S. Smoking Cessation Attempts and Common Strategies Employed.  
26 *Deutsches Arzteblatt International* 2020;117:7-13.
- 27 10. Strobel L, Schneider NK, Krampe H, et al. German medical students lack knowledge of how to  
28 treat smoking and problem drinking. *Addiction* 2012;107:1878-82.
- 29 11. Twardella D, Brenner H. Lack of training as a central barrier to the promotion of smoking  
30 cessation: a survey among general practitioners in Germany. *European Journal of Public*  
31 *Health* 2005;15:140-5.
- 32 12. Hoch E, Franke A, Sonntag H, et al. Raucherentwöhnung in der primärärztlichen Versorgung –  
33 Chance oder Fiktion? Ergebnisse der "Smoking and Nicotine Dependence Awareness and  
34 Screening (SNICAS)"-Studie. *Suchtmedizin in Forschung und Praxis* 2004;6:47-51.
- 35 13. Raupach T, Merker J, Hasenfuss G, et al. Knowledge gaps about smoking cessation in  
36 hospitalized patients and their doctors. *European Journal of Cardiovascular Prevention and*  
37 *Rehabilitation* 2011;18:334-41.
- 38 14. Cancer Research UK. Smoking Cessation in Primary Care: A cross-sectional survey of primary  
39 care health practitioners in the UK and the use of Very Brief Advice. 2019,  
40 [https://www.cancerresearchuk.org/sites/default/files/tobacco\\_pc\\_report\\_to\\_publish -](https://www.cancerresearchuk.org/sites/default/files/tobacco_pc_report_to_publish_-_full12.pdf)  
41 [\\_full12.pdf](https://www.cancerresearchuk.org/sites/default/files/tobacco_pc_report_to_publish_-_full12.pdf) (accessed 02. December 2019).
- 42 15. Carson KV, Verbiest MEA, Crone MR, et al. Training health professionals in smoking cessation.  
43 *Cochrane Database of Systematic Reviews* 2012
- 44 16. Framework Convention on Tobacco Control (FCTC) Article 14 Guidelines. 2010,  
45 [http://www.who.int/fctc/guidelines/adopted/article\\_14/en/](http://www.who.int/fctc/guidelines/adopted/article_14/en/) (accessed 28 Feb 2020).
- 46 17. Verbiest ME, Crone MR, Scharloo M, et al. One-hour training for general practitioners in  
47 reducing the implementation gap of smoking cessation care: a cluster-randomized controlled  
48 trial. *Nicotine & Tobacco Research* 2014;16:1-10.
- 49 18. Girvalaki C, Papadakis S, Vardavas C, et al. Training General Practitioners in Evidence-Based  
50 Tobacco Treatment: An Evaluation of the Tobacco Treatment Training Network in Crete  
51 (TiTAN-Crete) Intervention. *Health Education & Behavior* 2018;1090198118775481.
- 52 19. McRobbie H, Hajek P, Feder G, et al. A cluster-randomised controlled trial of a brief training  
53 session to facilitate general practitioner referral to smoking cessation treatment. *Tobacco*  
54 *Control* 2008;17:173-6.

- 1 20. Bobak A, Raupach T. Effect of a short smoking cessation training session on smoking cessation  
2 behaviour and its determinants among GP trainees in England. *Nicotine & Tobacco Research*  
3 2017
- 4 21. Unrod M, Smith M, Spring B, et al. Randomized Controlled Trial of a Computer-Based, Tailored  
5 Intervention to Increase Smoking Cessation Counseling by Primary Care Physicians. *Journal*  
6 *of General Internal Medicine* 2007;22:478-84.
- 7 22. Twardella D, Brenner H. Effects of practitioner education, practitioner payment and  
8 reimbursement of patients' drug costs on smoking cessation in primary care: a cluster  
9 randomised trial. *Tobacco Control* 2007;16:15-21.
- 10 23. Ministry of Health. The New Zealand Guidelines for Helping People to Stop Smoking. 2014,  
11 <http://www.health.govt.nz/publication/new-zealand-guidelines-helping-people-stop-smoking>  
12 (accessed 06 Mar 2020).
- 13 24. Guidelines in Practice: Very brief advice can be effective in encouraging smokers to quit.  
14 [https://www.guidelinesinpractice.co.uk/smoking-cessation/very-brief-advice-can-be-](https://www.guidelinesinpractice.co.uk/smoking-cessation/very-brief-advice-can-be-effective-in-encouraging-smokers-to-quit/337163.article)  
15 [effective-in-encouraging-smokers-to-quit/337163.article](https://www.guidelinesinpractice.co.uk/smoking-cessation/very-brief-advice-can-be-effective-in-encouraging-smokers-to-quit/337163.article) (accessed 14 Feb 2020).
- 16 25. Very brief advice training. *British Dental Journal* 2012;212:212-12.
- 17 26. Kotz D, Brown J, West R. Predictive validity of the Motivation To Stop Scale (MTSS): a single-  
18 item measure of motivation to stop smoking. *Drug and Alcohol Dependence* 2013;128:15-9.
- 19 27. Hummel K, Brown J, Willemsen MC, et al. External validation of the Motivation To Stop Scale  
20 (MTSS): findings from the International Tobacco Control (ITC) Netherlands Survey.  
21 *European Journal of Public Health* 2017;27:129-34.
- 22 28. Park ER, Gareen IF, Japuntich S, et al. Primary care provider-delivered smoking cessation  
23 interventions and smoking cessation among participants in the national lung screening trial.  
24 *JAMA Internal Medicine* 2015;175:1509-16.
- 25 29. Martinez C, Castellano Y, Andres A, et al. Factors associated with implementation of the 5A's  
26 smoking cessation model. *Tobacco Induced Diseases* 2017;15:41.
- 27 30. Bartsch AL, Harter M, Niedrich J, et al. A Systematic Literature Review of Self-Reported  
28 Smoking Cessation Counseling by Primary Care Physicians. *PLoS One* 2016;11:e0168482.
- 29 31. Kastaun S, Leve V, Hildebrandt J, et al. Effectiveness of training general practitioners to improve  
30 the implementation of brief stop-smoking advice in German primary care: study protocol of a  
31 pragmatic, 2-arm cluster randomised controlled trial (the ABCII trial). *BMC Family Practice*  
32 2019;20:107.
- 33 32. Michie S, van Stralen MM, West R. The behaviour change wheel: a new method for  
34 characterising and designing behaviour change interventions. *Implementation Science*  
35 2011;6:42.
- 36 33. Michie S, Richardson M, Johnston M, et al. The behavior change technique taxonomy (v1) of 93  
37 hierarchically clustered techniques: building an international consensus for the reporting of  
38 behavior change interventions. *Annals of Behavioral Medicine* 2013;46:81-95.
- 39 34. Fidler JA, Shahab L, West R. Strength of urges to smoke as a measure of severity of cigarette  
40 dependence: comparison with the Fagerstrom Test for Nicotine Dependence and its  
41 components. *Addiction* 2011;106:631-8.
- 42 35. R Foundation for Statistical Computing. R: a language and environment for statistical computing.  
43 3.6.1 version. Vienna: Austria: R Core Team, 2013.
- 44 36. van Buuren S, Groothuis-Oudshoorn K. mice: Multivariate Imputation by Chained Equations in R.  
45 *Journal of Statistical Software* 2011;45:1-67.
- 46 37. Rubin DB. Multiple Imputation for Nonresponse in Surveys. New York: John Wiley and Sons  
47 1987.
- 48 38. Pbert L, Adams A, Quirk M, et al. The patient exit interview as an assessment of physician-  
49 delivered smoking intervention: a validation study. *Health Psychology* 1999;18:183-8.
- 50 39. Murray RL, McNeill A. Reducing the social gradient in smoking: initiatives in the United  
51 Kingdom. *Drug and Alcohol Review* 2012;31:693-7.
- 52 40. Butler CC, Rollnick S, Cohen D, et al. Motivational consulting versus brief advice for smokers in  
53 general practice: a randomized trial. *The British Journal of General Practice* 1999;49:611-16.

1 **Table 1** Baseline characteristics of general practitioners (GP), stratified by training method  
2 (N=69 GPs from 52 practices).

|                                                                           | <b>ABC<br/>Training<br/>(n = 32)</b> | <b>5A<br/>Training<br/>(n = 37)</b> | <b>Total<br/>sample<br/>(N = 69)</b> |
|---------------------------------------------------------------------------|--------------------------------------|-------------------------------------|--------------------------------------|
| Age, years (mean ± SD)                                                    | 51.5 ± 7.5                           | 52.8 ± 8.0                          | 52.2 ± 7.7                           |
| Sex                                                                       |                                      |                                     |                                      |
| Female                                                                    | 56.3% (18)                           | 48.7% (18)                          | 52.2% (36)                           |
| Male                                                                      | 43.8% (14)                           | 51.4% (19)                          | 47.8% (33)                           |
| Years since becoming physician (mean ± SD)                                | 22.6 ± 8.0                           | 23.7 ± 9.0                          | 26.1 ± 24.2                          |
| Years since established in practice (mean ± SD)                           | 11.4 ± 8.6                           | 13.5 ± 9.2                          | 12.5 ± 8.9                           |
| Type of GP practice                                                       |                                      |                                     |                                      |
| Single practice                                                           | 37.5% (12)                           | 21.6% (8)                           | 29.0% (20)                           |
| Any type of group practice                                                | 62.5% (20)                           | 78.4% (29)                          | 31.0% (49)                           |
| Area where GP practice is located                                         |                                      |                                     |                                      |
| Rural area (<20,000 inhabitants)                                          | 3.1% (1)                             | 5.4% (2)                            | 4.4% (3)                             |
| Small city (>20,000 inhabitants)                                          | 3.1% (1)                             | 5.4% (2)                            | 4.4% (3)                             |
| City (<100,000 inhabitants)                                               | 31.3% (10)                           | 13.5% (5)                           | 21.7% (15)                           |
| Large city (>100,000 inhabitants)                                         | 62.5% (20)                           | 75.7% (28)                          | 69.6% (48)                           |
| Ever participated in training on providing smoking cessation before = Yes | 25.0% (8)                            | 21.6% (8)                           | 23.2% (16)                           |
| Current smoking status of GP                                              |                                      |                                     |                                      |
| Daily smoker                                                              | 3.1% (1)                             | 0.0% (0)                            | 1.5% (1)                             |
| Occasional smoker                                                         | 15.6% (5)                            | 5.4% (2)                            | 10.1% (7)                            |
| Ex-smoker                                                                 | 21.9% (7)                            | 32.4% (12)                          | 27.5% (19)                           |
| Never smoker                                                              | 59.4% (19)                           | 62.2% (23)                          | 60.9% (42)                           |

3 Data are presented as mean± standard deviation (SD) or percentages (number, N); GP = general  
4 practitioner.

5

1 **Table 2** Baseline characteristics of all tobacco smoking patients, stratified by pre-post data collection period and  
2 by training method of the general practitioner they had consulted (N = 1,937).

|                                                               | <b>Pre-<br/>training<br/>(n = 1,039)</b> | <b>Post-<br/>training<br/>(n = 898)</b> | <b>ABC<br/>Training<br/>(n = 986)</b> | <b>5A<br/>Training<br/>(n = 951)</b> | <b>Total<br/>sample<br/>(N = 1,937)</b> |
|---------------------------------------------------------------|------------------------------------------|-----------------------------------------|---------------------------------------|--------------------------------------|-----------------------------------------|
| Age, years (mean ± SD)                                        | 46.1 ± 16.1                              | 46.0 ± 15.7                             | 46.2 ± 16.0                           | 45.9 ± 15.8                          | 46.1 ± 15.9                             |
| Sex                                                           |                                          |                                         |                                       |                                      |                                         |
| Female                                                        | 52.4% (544)                              | 52.1% (468)                             | 56.0% (552)                           | 48.4% (460)                          | 52.3% (1,012)                           |
| Male                                                          | 47.5% (493)                              | 47.7% (428)                             | 44.0% (434)                           | 51.2% (487)                          | 47.6% (921)                             |
| Level of education†                                           |                                          |                                         |                                       |                                      |                                         |
| High school equiv.                                            | 21.6% (224)                              | 22.8% (205)                             | 22.4% (221)                           | 21.9% (208)                          | 22.2% (429)                             |
| Adv. techn. college equiv.                                    | 14.9% (155)                              | 13.2% (118)                             | 16.2% (160)                           | 11.9% (113)                          | 14.1% (273)                             |
| Secondary school equiv.                                       | 29.7% (309)                              | 28.1% (252)                             | 29.3% (289)                           | 28.6% (272)                          | 29.0% (561)                             |
| Junior high school equiv.                                     | 30.5% (317)                              | 32.3% (290)                             | 29.1% (287)                           | 33.7% (320)                          | 31.3% (607)                             |
| No qualification                                              | 3.2% (33)                                | 3.6% (32)                               | 2.7% (27)                             | 4.0% (38)                            | 3.4% (65)                               |
| Cigarettes/day (mean ± SD)                                    | 14.0 ± 9.3                               | 13.6 ± 9.4                              | 13.2 ± 9.2                            | 14.5 ± 9.4                           | 13.8 ± 9.3                              |
| Time spend with urges to<br>smoke§ <sup>a</sup> (mean ± SD)   | 2.9 ± 1.5                                | 3.0 ± 1.5                               | 3.0 ± 1.5                             | 2.9 ± 1.6                            | 2.9 ± 1.5                               |
| Strength of urge to smoke§ <sup>b</sup><br>(mean ± SD)        | 2.0 ± 0.9                                | 2.1 ± 1.0                               | 2.0 ± 0.9                             | 2.1 ± 0.9                            | 2.0 ± 0.9                               |
| Motivation to stop smoking<br>(MRS)¥ (mean ± SD)              | 3.3 ± 1.8                                | 3.3 ± 1.9                               | 3.4 ± 1.8                             | 3.1 ± 1.8                            | 3.3 ± 1.8                               |
| Satisfaction with conversation<br>on smoking with GP (if so)# | 2.0 ± 0.9                                | 2.0 ± 0.9                               | 2.0 ± 0.9                             | 2.0 ± 0.9                            | 2.0 ± 0.9                               |

3 Data are presented as mean± standard deviation (SD) or percentages (number, N). †German equivalents to education levels  
4 listed in table from highest to lowest: high school equivalent (“Allgemeine Hochschulreife”), advanced technical college  
5 equivalent (“Fachhochschulreife”), secondary school equivalent (“Realschulabschluss”), junior high school equivalent  
6 (“Hauptschulabschluss”), or no qualification; §VRS (“Verlangen zum Rauchen Skala”) = German version of the Strength of  
7 Urges to Smoke Scale (SUTS)<sup>34</sup>; SUTS§<sup>b</sup> is only posed to respondents who did not answer SUTS§<sup>a</sup> with “not at all”; ¥MRS  
8 (“Motivation zum Rauchstopp Skaka”) = German version of the Motivation To Stop Scale (MTSS)<sup>26</sup>, #asked only to  
9 smoking patients who had a conversation on smoking with their GP (n=542) independently whether the patient reported the  
10 receipt of one of the outcomes, satisfaction was operationalised by ratings on a 6-point Likert scale ranging from 1 = “very  
11 satisfied” to 6 = “very dissatisfied; differences when calculating the total percentage can be explained by missing data on the  
12 respective variables.

1 **Table 3** Patient-reported receipt of brief stop-smoking advice (primary outcome) and of recommendations/prescriptions of evidence-based treatment to quit smoking  
2 (secondary outcomes) delivered by their general practitioner (GP), stratified by pre-post data collection period and by training method of the GP they had consulted; and  
3 associations of these outcomes with training (pre vs. post) and with the interaction of training by training method (ABC/5A x pre/post) (N=1,937 smoking patients)

| Outcome (patient-reported)                                    | Pre-training                    |                                |                                     | Post-training                    |                                 |                                    | aOR <sub>imputed</sub><br>Post vs. Pre (95% CI) <sup>†</sup> | aOR <sub>imputed</sub><br>ABC vs. 5A <sup>†</sup> x<br>Post vs. Pre<br>(95% CI) |
|---------------------------------------------------------------|---------------------------------|--------------------------------|-------------------------------------|----------------------------------|---------------------------------|------------------------------------|--------------------------------------------------------------|---------------------------------------------------------------------------------|
|                                                               | Pre <sub>ABC</sub><br>(n = 527) | Pre <sub>5A</sub><br>(n = 512) | Pre <sub>total</sub><br>(n = 1,039) | Post <sub>ABC</sub><br>(n = 459) | Post <sub>5A</sub><br>(n = 439) | Post <sub>total</sub><br>(n = 898) |                                                              |                                                                                 |
| Brief stop-smoking advice<br>(primary outcome)                | 11.8% (62)                      | 14.5% (74)                     | 13.1% (136)                         | 35.7% (164)                      | 30.3% (133)                     | 33.1% (297)                        | 3.25 (2.34-4.51)***                                          | 1.71 (0.94-3.12)                                                                |
| Behavioural counselling<br>(individual, group)                | 1.5% (8)                        | 1.6% (8)                       | 1.5% (16)                           | 13.3% (61)                       | 3.9% (17)                       | 8.7% (78)                          | 7.15 (4.02-12.74)***                                         | 4.59 (1.40-14.98)                                                               |
| Nicotine replacement therapy                                  | 0.6% (3)                        | 0.4% (2)                       | 0.5% (5)                            | 3.3% (15)                        | 7.1% (31)                       | 5.12% (46)                         | 15.45 (5.67-42.10)***                                        | 0.21 (0.03-1.55)                                                                |
| Varenicline or bupropion                                      | 0% (0)                          | 1.4% (7)                       | 0.7% (7)                            | 3.1% (14)                        | 1.6% (7)                        | 2.3% (21)                          | 3.10 (1.27-7.53)***                                          | #                                                                               |
| Any pharmacotherapy                                           | 0.6% (3)                        | 1.8% (9)                       | 1.2% (12)                           | 6.3% (29)                        | 8.7% (38)                       | 7.5% (67)                          | 7.99 (4.11-15.52)***                                         | 1.81 (0.42-7.78)                                                                |
| Combination of behavioural<br>counselling and pharmacotherapy | 1.9% (10)                       | 1.8% (9)                       | 1.8% (19)                           | 7.6% (35)                        | 5.2% (23)                       | 6.5% (58)                          | 4.36 (2.46-7.73)***                                          | 1.42 (0.45-4.44)                                                                |

4 Data are presented as adjusted Odds Ratios (aOR) and 95% confidence interval (95%CI) around aOR. \*p<0.05; \*\*\*p<0.001; †Logistic regression models with a fixed effect for time (pre- vs.  
5 post training) and random effects for the practices and the time effect, for the ABC vs. 5A comparison: the group variable (5A or ABC training) and its interaction with time were added to  
6 the models as fixed effects; both models were adjusted for patients' sex, age, level of education, time spent with urges to smoke, and strength of urges to smoke (SUTS<sup>34</sup>); ; # model could not  
7 be fitted due to perfect separation.



1

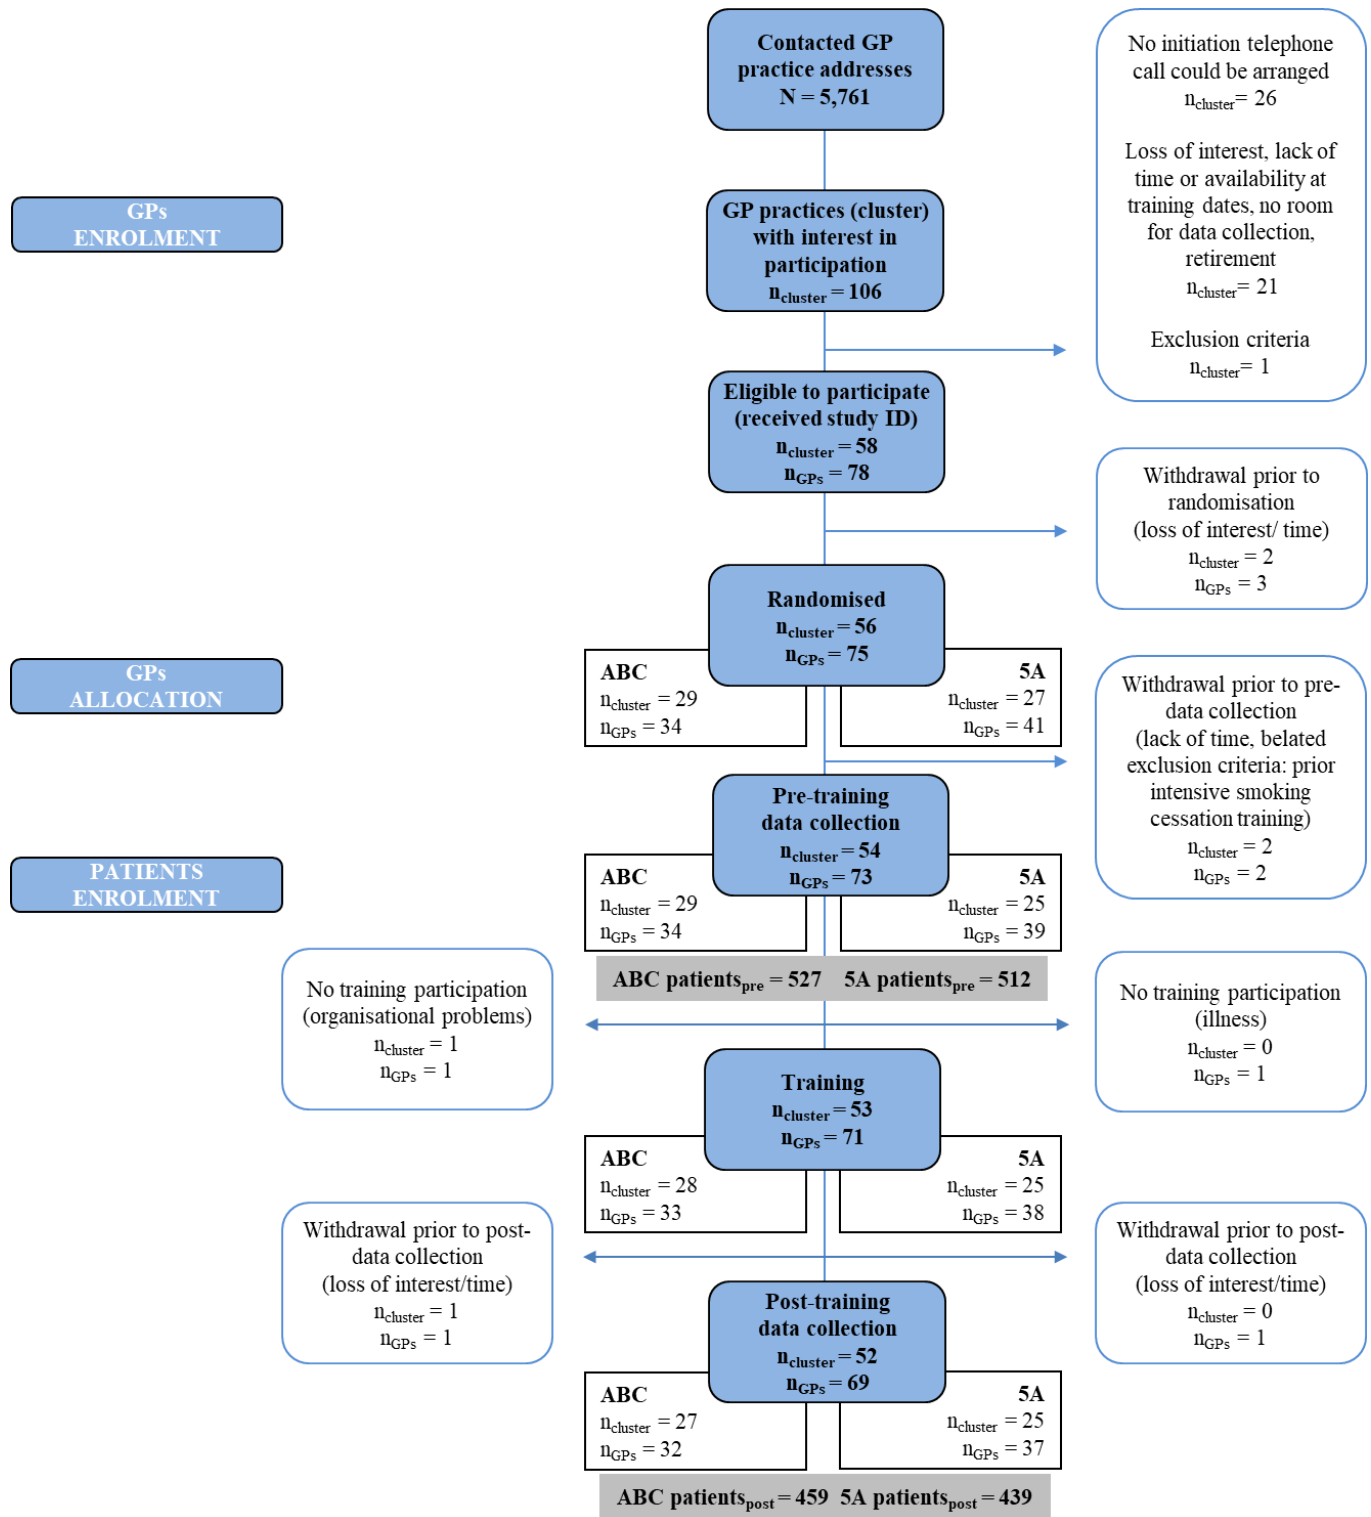

2

3 **Figure 1.** CONSORT chart showing trial flow of general practices and participating smoking patients  
4 by pre-training and post-training data collection period and study arm (ABC vs. 5A training)

1

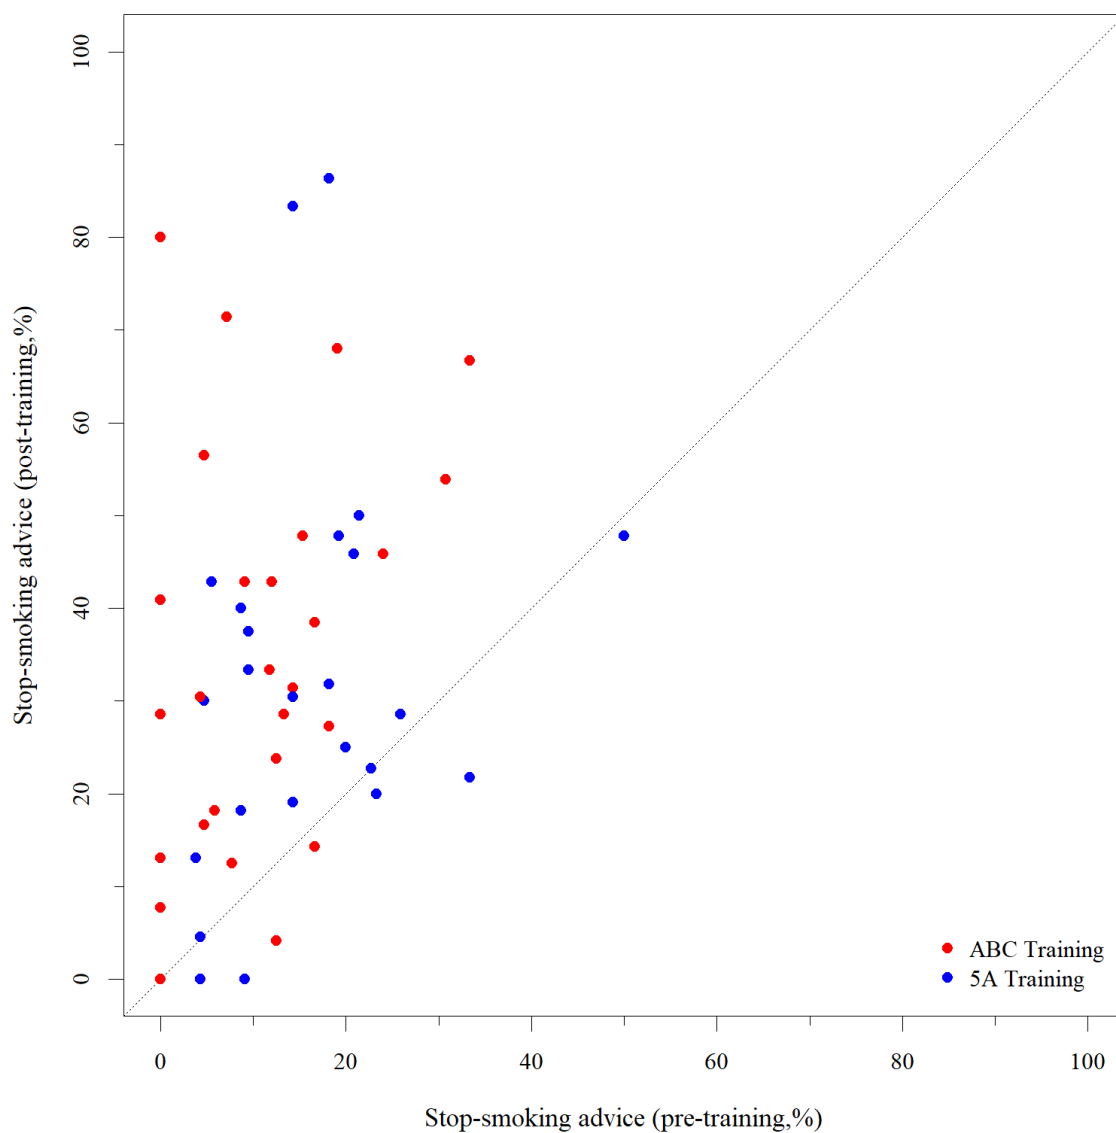

**Figure 2.** Scatter plot showing the relationship between the percentages of patients who reported the receipt of a stop-smoking advice delivered by their GP prior to the training (x-axis) and following the training (y-axis) by training group allocation of the GP
